# Supplementary material for: Vitamin D-binding protein controls T cell responses to vitamin D
Source: Springer Nature journal article supplement (doi:10.1186/s12865-014-0035-2), 2014-09-17
Supplement: MOESM1 [file 9736014]

**Additional file 1: Figure S1**

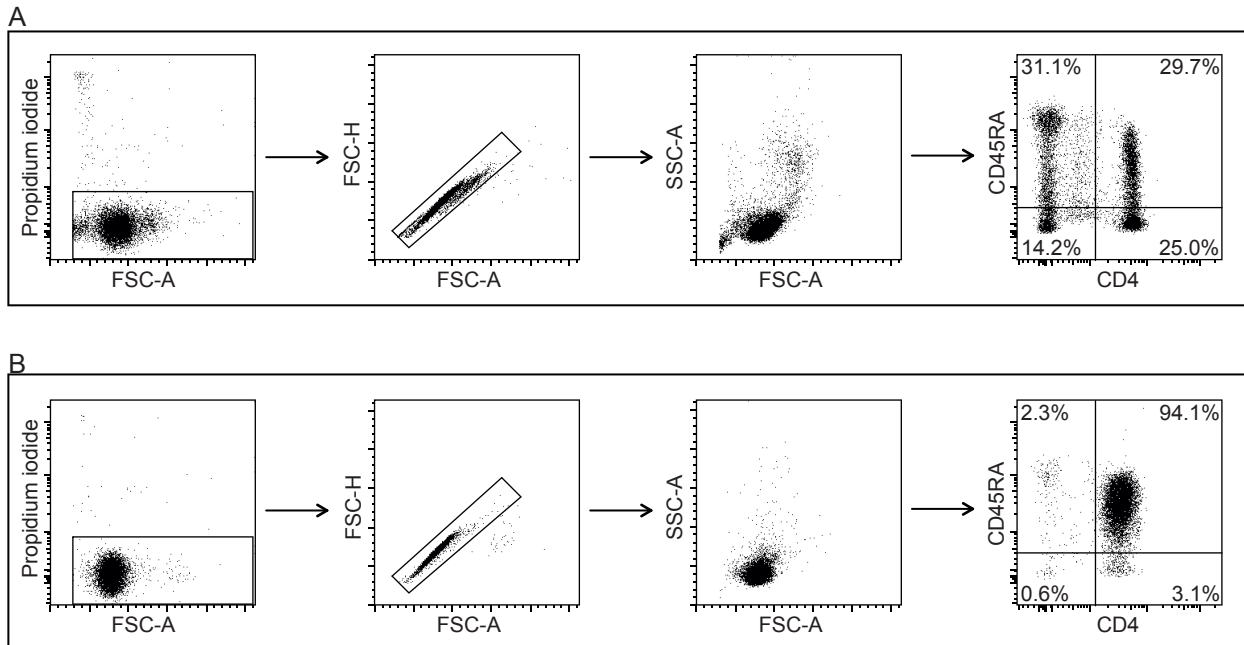

**Additional file 1: Figure S1**

Flow cytometric analysis of (A) PBMC and (B) purified naive CD4<sup>+</sup> T cells.
