# Supplementary material for: Vitamin D-binding protein controls T cell responses to vitamin D
Source: Springer Nature journal article supplement (doi:10.1186/s12865-014-0035-2), 2014-09-17
Supplement: MOESM2 [file 9736014]

## Additional file 2: Figure S2

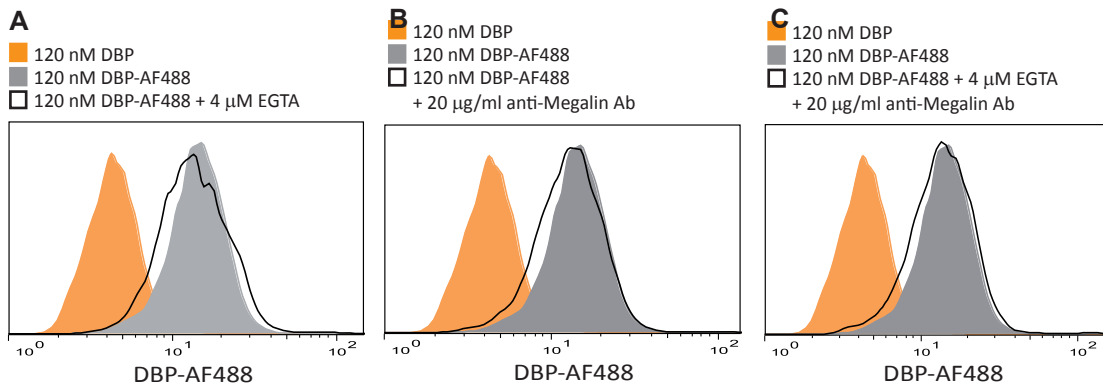

### Additional file 2: Figure S2 T cells do not take up DBP by megalin-mediated endocytosis

Flow cytometry histograms illustrating DBP-AF488 fluorescence of activated T cells incubated with 120 nM DBP or 120 nM DBP-AF488 in the absence or presence of (A) EGTA (4  $\mu$ M), (B) anti-megalin anti-body (20  $\mu$ g/ml) or (C) EGTA (4  $\mu$ M) plus anti-megalin antibody (20  $\mu$ g/ml).
